# Supplementary material for: A cascade signal-amplified fluorescent biosensor combining APE1 enzyme cleavage-assisted target cycling with rolling circle amplification
Source: Royal Society of Chemistry journal article supplement (doi:10.1039/d3an01727c), 2023-11-21
Supplement: d3an01727c1.pdf [file d3an01727c1.pdf]

## Electronic Supplementary Information

### **A cascade signal-amplified fluorescent biosensor combining APE1 enzyme cleavage-assisted target cycling with rolling circle amplification**

Zirui Liu<sup>a, 1</sup>, Hongqun Yang<sup>a,1</sup>, Beibei Zhang<sup>a,1</sup>, Xinhao Li<sup>a</sup>, Hong Wang,<sup>a,\*</sup> Yingwei Zhang<sup>a,\*</sup>

a State Key Laboratory of Chemical Resource Engineering, College of Materials Science and Engineering, Beijing University of Chemical Technology, Beijing 100029, China.

\* Corresponding Author

E-mail address: zhangyw@mail.buct.edu.cn

E-mail address: wanghong@mail.buct.edu.cn

1 Zirui Liu, Hongqun Yang, and Beibei Zhang contributed equally to the work.

## **1. Experimental section**

### **1.1 Reagents and chemicals**

The DNA and RNA sequences purified by high-performance liquid chromatography (HPLC) (see Table S1.) were purchased from Sangon Biotech Biotechnology Co. Ltd. (Shanghai, China). Sulfur T (AR) was also purchased from Sangon Biotech Biotechnology Co. Ltd. (Shanghai, China). Purchase of sodium dihydrogen phosphate (AR) and disodium hydrogen phosphate (AR) from Shanghai Hushi Chemical Co., Ltd. Sodium acetate (AR), tri-(hydroxymethyl) aminomethane (99.99%), tetramethylethylenediamine (99.5%), and ammonium persulfate (98%) were purchased from Shanghai Aladdin Biochemical Technology Co. Ltd. Magnesium Chloride (98%) was purchased from Tianjin Guangfu Technology Development Co. Ltd. Magnesium acetate (98%) was purchased from McLean Biochemical Technology Co. Ltd. Both Bst polymerase and Apurinic/apyrimidinic endonuclease I (APE1) were obtained from NEB. All solutions were prepared using double-distilled ultrapure water purified by a Milli-Q system (Eco-S30, Shanghai Hetai Instrument Co. Ltd., China).

### **1.2 Apparatus and measurements**

The UV visible absorption spectrum was measured using an ultramicro nucleic acid protein analyzer (NanoDrop One, ThermoFisher) with wavelengths ranging from 200 to 800 nm. The fluorescence spectrum was recorded using an F-7000 fluorescence spectrophotometer (Hitachi) at room temperature, with an excitation wavelength of 440 nm and a fluorescence collection range of 460-640 nm.

## **2. Optimizing experimental conditions**

### **2.1 Optimizing APE1 enzyme concentration and reaction time**

The reaction products obtained by optimizing APE1 enzyme concentration and APE1 enzyme reaction time were characterized by 8% polyacrylamide gel

electrophoresis. Polyacrylamide gel electrophoresis experiment was performed at 100 V constant voltage for 70 min in 0.5xTBE buffer at room temperature. Then, the gel was put into GelRed dye and dyed for 30 min before gel imaging in Genosens 2100 imaging system (Clinx Science Instruments Co., China.).

To optimize the concentration of APE1 enzyme and the enzyme cleavage time, we conducted experiments using the following conditions: HP and miRNA-21 were each set at a concentration of 1  $\mu$ M, and the reaction was carried out in 1 $\times$  Bst reaction buffer with a total reaction volume of 10  $\mu$ l. The reaction was maintained at 37  $^{\circ}$ C for 2 hours to ensure complete hybridization between miRNA-21 and HP. Subsequently, APE1 enzyme was introduced at three different concentrations: 0.05 U/ $\mu$ l, 0.1 U/ $\mu$ l, and 0.15 U/ $\mu$ l, respectively. The reaction was allowed to proceed at 37  $^{\circ}$ C for 1 hour. Finally, the reaction mixture was heat-treated at 65  $^{\circ}$ C for 20 minutes to deactivate the APE1 enzyme.

To optimize the APE1 reaction time, we utilized the optimal enzyme concentration condition of 0.05 U/ $\mu$ l, and then the enzyme cleavage reactions were carried out at 37  $^{\circ}$ C for varying durations, specifically, 0.5 hours, 1 hour, 1.5 hours, and 2 hours, respectively. Following each reaction, the samples were subsequently treated at 65  $^{\circ}$ C for 20 minutes to deactivate the APE1 enzyme.

## **2.2 Optimizing the rolling circle amplification reaction conditions**

The second part of this experiment involves hybridization of HP1 with a dumbbell circular template DP, followed by a rolling circle amplification reaction to obtain DNA long chains products containing G quadruplex. We conducted optimization of the rolling circle amplification (RCA) reaction parameters as follows: (1) Optimization of Bst Polymerase Concentration: We varied the concentration of Bst polymerase in the reaction system, testing it at 0.1 U/ $\mu$ l, 0.2 U/ $\mu$ l, 0.3 U/ $\mu$ l, and 0.4 U/ $\mu$ l. (2) Optimization of dNTPs Concentration: We experimented with different concentrations of dNTPs in the reaction system, ranging from 0.25 mM, 0.5 mM, 0.75 mM, to 1 mM. (3) Optimization of Reaction Time for Rolling Circle Amplification: The reaction time was systematically adjusted to 0.5 h, 1 h, 2 h, 3 h, and 4 h, respectively. After obtaining the

RCA products containing G quadruplex, 10 mM of KCl and 10  $\mu$ M of ThT were added into the reaction system, and then the fluorescence signal intensity was detected using a fluorescence spectrophotometer (HITACHI F 7000, Ex=440nm)

### 2.3 Optimizing the concentration of ThT and KCl

In the third part of this experiment, KCl was added into RCA products to form the G quadruplex structure, and then the added ThT would insert into the G quadruplex to achieve fluorescence signal enhancement. We optimized the concentration of ThT and KCl: (1) Optimize KCl concentration: We varied the KCl concentration in the reaction system, testing it at 5 mM, 10 mM, 20 mM, and 40 mM; (2) Optimize ThT concentration: The ThT concentrations in the reaction system were adjusted to 5  $\mu$ M, 10  $\mu$ M, 20  $\mu$ M, 40  $\mu$ M, and 50  $\mu$ M, respectively. Subsequently, fluorescence signal intensity was measured using a fluorescence spectrophotometer (Ex=440 nm).

**Table S1.** The sequences for the nucleic acids used in this work.

| Name    | Sequence (5'-3')                                              |
|---------|---------------------------------------------------------------|
| DP      | PCGCGTTCCCAACCCGCCCTACCCAACGCGGTGGATGT<br>TGACTAGTTCCGAATCCAC |
| HP      | TCGGAAGTAGTCAACATCXGTCTGATAAGCTATGACT<br>AGACCTTCCGAATAGCTT   |
| miRN-21 | UAGCUUAUCAGACUGAUGUUGA                                        |

**Note:** X represents the AP site recognized by APE1, and P represents the Phosphate.

**Table S2.** Comparison of this biosensor with the previously reported strategies for miRNAs detection.

| Method       | Linear range | Detection limit | Reaction time | Nanomaterials sample | type of microRNA | amplification strategy | In vitro /in vivo detection/imaging | With APE1 | References |
|--------------|--------------|-----------------|---------------|----------------------|------------------|------------------------|-------------------------------------|-----------|------------|
| Fluorescence | 2-60 nM      | 680 pM          | 2 h           | ZIF-8                | microRNA21       | No                     | In vivo imaging                     | No        | 1          |
| Fluorescence | 0-16 nM      | 47 pM           | 30 min        | GO                   | microRNA21       | CHA                    | In vitro detection                  | No        | 2          |
| Fluorescence | 0.2-30 nM    | 100 pM          | 3 h           | DNA-AgNCs            | microRNA155      | No                     | In vitro detection                  | No        | 3          |
| Fluorescence | 0.15-37.5 nM | 130 pM          | 2 h           | DNA tetrahedron      | microRNA21       | No                     | In vitro detection and imaging      | No        | 4          |
| Fluorescence | 2-10 nM      | 1000 pM         | 30 min        | QD                   | microRNA21       | No                     | In vitro detection                  | No        | 5          |
| Fluorescence | 0.1-10 nM    | 80 pM           | 4 h           | DNA triangular prism | microRNA21       | CHA                    | In vivo imaging                     | No        | 6          |
| Fluorescence | 0.2-100nM    | 200pM           | 20 min        | —                    | microRNA21       | SDR                    | In vivo imaging                     | Yes       | 7          |
| Fluorescence | 0-10nM       | 5.6pM           | 110 min       | Streptavidin protein | microRNA21       | CHA                    | In vivo imaging                     | Yes       | 8          |
| Fluorescence | 0.2-6nM      | 22.9 pM         | —             | gold nanorod         | microRNA21       | DNAzyme                | In vivo imaging                     | Yes       | 9          |
| Fluorescence | 0-100 nM     | 3.33 pM         | 2 h           | —                    | microRNA21       | RCA                    | In vitro detection                  | Yes       | This work  |

## References:

- [1] Yi, J. T., Chen, T. T., Huo, J., Chu, X. *Anal. Chem.* 2017, 89, 12351-12359.
- [2] Zhen, S. J., Xiao, X., Li, C. H., Huang, C. Z. *Anal. Chem.* 2017, 89, 8766-8771.
- [3] Hosseini, M., Akbari, A., Ganjali, M. R., Dadmehr, M., Rezayan, A. H. *J. Fluoresc.* 2015, 25, 925-929.
- [4] Su, J., Wu, F. B., Xia, H. P., Wu, Y. F., Liu, S. Q. *Chem. Sci.* 2020, 11, 80-86.
- [5] Qiu, X., Hildebrandt, N. *ACS Nano* 2015, 9, 8449-8457.
- [6] Duan, L.Y., Liu, J. W., Yu, R. Q., Jiang, J. H. *Biosens. Bioelectron.*, 2021, 177, 112976.
- [7] Yu, Y. J., Li, L. D., Li, G. B., Zhou, X., Deng, T. T., Liang, M., Nie, G. H., *Chem. Commun.*, 2021, 57, 3753-3756.
- [8] Feng, Y. T., Luo, Z. W., Wu, J., Huang, Z. J., He, L., Feng, Y. Q., Li, X., Zhang, X. D., Tian, Y. H., Li, Y. X., Duan, Y. X., *Sens. Actuators B Chem.*, 2022, 373, 132708.
- [9] Cai, Z. H., Wang, A., Wang, Y., Qiu, Z. L., Li, Y. T., Yan, H. R., Fu, M. Y., Liu, M. Y., Yu, Y. Y., Gao, F. L., *Anal. Chem.*, 2022, 94, 9715-9723.
